# Supplementary material for: The Association Between Cephalosporin and Hypoprothrombinemia: A Systematic Review and Meta-Analysis
Source: MDPI journal article supplement (doi:10.3390/ijerph16203937), 2019-10-16
Supplement: s1 [file s1]

**Table S1. Search strategy.**

| <b>PubMed</b>   |                                                                                                                                                                                                                                                                                                      |
|-----------------|------------------------------------------------------------------------------------------------------------------------------------------------------------------------------------------------------------------------------------------------------------------------------------------------------|
| #1              | "Cephalosporins"[Mesh] OR "cephalosporin"[All Fields] OR "cephalosporins"[All Fields]                                                                                                                                                                                                                |
| #2              | cefamandole OR cefmenoxime OR cefmetazole OR cefoperazone OR cefotetan OR moxalactam                                                                                                                                                                                                                 |
| #3              | "Hypoprothrombinemias"[Mesh] OR "hypoprothrombinemia"[All Fields] OR "hypoprothrombinemias"[All Fields] OR "hypoprothrombinaemia"[All Fields] OR "hypoprothombinaemias"[All Fields]                                                                                                                  |
| #4              | "Hemorrhage/chemically induced"[Mesh] OR "bleeding"[All Fields] OR "hemorrhage"[All Fields] OR "hemorrhages"[All Fields] OR "haemorrhage"[All Fields]                                                                                                                                                |
| #5              | #1 AND #3                                                                                                                                                                                                                                                                                            |
| #6              | #1 AND #4                                                                                                                                                                                                                                                                                            |
| #7              | #2 AND #3                                                                                                                                                                                                                                                                                            |
| #8              | #2 AND #4                                                                                                                                                                                                                                                                                            |
| <b>EMBASE</b>   |                                                                                                                                                                                                                                                                                                      |
| #1              | 'cephalosporin'/exp OR cephalosporin OR cephalosporins                                                                                                                                                                                                                                               |
| #2              | 'cefamandole'/exp OR cefamandole OR 'cefmenoxime'/exp OR cefmenoxime OR 'cefmetazole'/exp OR cefmetazole OR 'cefotetan'/exp OR cefotetan OR 'latamoxef'/exp OR latamoxef OR moxalactam OR 'cefoperazone'/exp OR cefoperazone                                                                         |
| #3              | 'hypoprothrombinemia'/exp OR hypoprothrombinemia OR hypoprothrombinemias OR hypoprothrombinaemia OR hypoprothrombinaemias                                                                                                                                                                            |
| #4              | 'bleeding'/mj (49985)                                                                                                                                                                                                                                                                                |
| #5              | #1 AND #3                                                                                                                                                                                                                                                                                            |
| #6              | #1 AND #4                                                                                                                                                                                                                                                                                            |
| #7              | #2 AND #3                                                                                                                                                                                                                                                                                            |
| #8              | #2 AND #4                                                                                                                                                                                                                                                                                            |
| <b>Cochrane</b> |                                                                                                                                                                                                                                                                                                      |
| #1              | [cephalosporins/explode all trees] OR cephalosporins OR cephalosporin                                                                                                                                                                                                                                |
| #2              | [cefamandole/explode all trees] OR [cefmenoxime/explode all trees] OR [cefmetazole/explode all trees] OR [cefoperazone/explode all trees] OR [cefotetan/explode all trees] OR [moxalactam/explode all trees] OR cefamandole OR cefmenoxime OR cefmetazole OR cefoperazone OR cefotetan OR moxalactam |
| #3              | [hypoprothrombinemias/explode all trees] OR hypoprothrombinemias OR hypoprothrombinemia OR hypoprothrombinaemia OR hypoprothrombinaemias                                                                                                                                                             |
| #4              | [hemorrhage/explode all trees] OR hemorrhage OR hemorrhages OR haemorrhages OR haemorrhage OR bleeding                                                                                                                                                                                               |
| #5              | #1 AND #3                                                                                                                                                                                                                                                                                            |
| #6              | #1 AND #4                                                                                                                                                                                                                                                                                            |
| #7              | #2 AND #3                                                                                                                                                                                                                                                                                            |
| #8              | #2 AND #4                                                                                                                                                                                                                                                                                            |
| <b>RISS</b>     |                                                                                                                                                                                                                                                                                                      |
| #1              | cephalosporin   cephalosporins<AND> hypoprothrombinemia   hypoprothrombinemias   hypoprothrombinaemia                                                                                                                                                                                                |
| #2              | cephalosporin   cephalosporins <AND> bleeding   hemorrhage   hemorrhages   haemorrhage   haemorrhages                                                                                                                                                                                                |
| #3              | cefamandole   cefmenoxime   cefmetazole   cefoperazone   cefotetan   moxalactam <AND> hypoprothrombinemia   hypoprothrombinemias   hypoprothrombinaemia                                                                                                                                              |
| #4              | cefamandole   cefmenoxime   cefmetazole   cefoperazone   cefotetan   moxalactam <AND> bleeding   hemorrhage   hemorrhages   haemorrhage   haemorrhages                                                                                                                                               |

**Table S2. National Evidence-based healthcare Collaborating Agency (NECA) RoB guidelines.**

| Item                                      | Criteria                                                                                                                                                                                                                                                                                            | Risk    |
|-------------------------------------------|-----------------------------------------------------------------------------------------------------------------------------------------------------------------------------------------------------------------------------------------------------------------------------------------------------|---------|
| <b>SELECTION BIAS</b>                     |                                                                                                                                                                                                                                                                                                     |         |
| 1. Random sequence generation             | Sequence generation process such as: <ul style="list-style-type: none"> <li>- Random number table</li> <li>- Computer random number generator</li> <li>- Coin tossing</li> <li>- Shuffling cards or envelopes</li> </ul>                                                                            | Low     |
|                                           | Non-random component in the sequence generation process such as: <ul style="list-style-type: none"> <li>- Odd or even date of birth</li> <li>- Date of admission</li> <li>- Hospital record number</li> <li>- Results of laboratory test</li> <li>- Allocation by clinician/participants</li> </ul> | High    |
|                                           | Insufficient information                                                                                                                                                                                                                                                                            | Unclear |
| 2. Allocation concealment                 | Participants and investigators enrolling participants could not foresee assignment because one of the following, or an equivalent method, was used to conceal allocation                                                                                                                            | Low     |
|                                           | Participants or investigators enrolling participants could possibly foresee assignments and thus introduce selection bias                                                                                                                                                                           | High    |
|                                           | Insufficient information                                                                                                                                                                                                                                                                            | Unclear |
| <b>PERFORMANCE BIAS</b>                   |                                                                                                                                                                                                                                                                                                     |         |
| 3. Blinding of participants and personnel | Blinding of participants and key study personnel ensured or review author judge that the outcome is not likely influenced by lack of blinding                                                                                                                                                       | Low     |
|                                           | No blinding or incomplete blinding                                                                                                                                                                                                                                                                  | High    |
|                                           | Insufficient information                                                                                                                                                                                                                                                                            | Unclear |
| <b>DETECTION BIAS</b>                     |                                                                                                                                                                                                                                                                                                     |         |
| 4. Blinding of outcome assessment         | Blinding of outcome assessment ensured or review author judge that the outcome is not likely influenced by lack of blinding                                                                                                                                                                         | Low     |
|                                           | No blinding or incomplete blinding                                                                                                                                                                                                                                                                  | High    |
|                                           | Insufficient information                                                                                                                                                                                                                                                                            | Unclear |
| <b>ATTRITION BIAS</b>                     |                                                                                                                                                                                                                                                                                                     |         |
| 5. Incomplete outcome data                | <ul style="list-style-type: none"> <li>- No missing outcome data</li> <li>- Reasons for missing outcome data unlikely to be related to true outcome</li> <li>- Missing outcome data balanced in numbers across intervention groups, with similar reasons for missing data across groups;</li> </ul> | Low     |
|                                           | Reason for missing outcome data likely to be related to true outcome, with either imbalance in numbers or reasons for missing data across intervention groups                                                                                                                                       | High    |
|                                           | Insufficient information                                                                                                                                                                                                                                                                            | Unclear |
| <b>REPORTING BIAS</b>                     |                                                                                                                                                                                                                                                                                                     |         |

|                        |                                                                                      |         |
|------------------------|--------------------------------------------------------------------------------------|---------|
| 6. Selective reporting | All of the study's pre-specified outcomes that are of interest has been reported     | Low     |
|                        | Not all of the study's pre-specified outcomes that are of interest has been reported | High    |
|                        | Insufficient information                                                             | Unclear |
| <b>OTHER</b>           |                                                                                      |         |
| 7. Other bias          | The study appears to be free of other bias                                           | Low     |
|                        | There is at least one important risk of bias                                         | High    |
|                        | Insufficient information                                                             | Unclear |

**Table S3. Criteria for modified Newcastle-Ottawa Scale.**

| Item                                                                        | Criteria                                                                                              | Score     |
|-----------------------------------------------------------------------------|-------------------------------------------------------------------------------------------------------|-----------|
| <b>SELECTION</b>                                                            |                                                                                                       |           |
| 1. Representativeness of the exposed cohort                                 | Population-based study, random recruitment of participants, or consecutive enrollment of participants | One star  |
|                                                                             | Selected group of users                                                                               | Zero star |
|                                                                             | No description                                                                                        | Zero star |
| 2. Selection of non-exposed cohort                                          | Drawn from same source as exposed cohort                                                              | One star  |
|                                                                             | Drawn from different source                                                                           | Zero star |
|                                                                             | No description                                                                                        | Zero star |
| 3. Ascertainment of exposure                                                | Medical records or structured interview                                                               | One star  |
|                                                                             | Self-report                                                                                           | Zero star |
|                                                                             | No description                                                                                        | Zero star |
| 4. Demonstration that outcome of interest was not present at start of study | Yes                                                                                                   | One star  |
|                                                                             | No                                                                                                    | Zero star |
| <b>COMPARABILITY</b>                                                        |                                                                                                       |           |
| 1. Comparability of cohorts on the basis of the design or analysis          | Adjustment or exclusion of the confounding factors for bleeding                                       | One star  |
|                                                                             | Adjustment or control of the confounding factors for patient characteristics                          | One star  |
|                                                                             | No description                                                                                        | Zero star |
| <b>OUTCOME</b>                                                              |                                                                                                       |           |
| 1. Ascertainment of outcome                                                 | Standardized assessment or confirmation of bleeding or PT prolongation in the medical record          | One star  |
|                                                                             | Self-report                                                                                           | Zero star |
|                                                                             | No description                                                                                        | Zero star |
| 2. Enough period of follow-up for outcome of interest to occur              | Yes                                                                                                   | One star  |
|                                                                             | No                                                                                                    | Zero star |
| 3. Adequacy of follow-up of cohorts                                         | Complete follow up of more than 90% of enrolled participants                                          | One star  |
|                                                                             | Follow up rate less than 90% and no description of those lost                                         | Zero star |
|                                                                             | No description                                                                                        | Zero star |

**Table S4. Newcastle-Ottawa Scale (NOS) for assessing the quality of cohort studies.**

| Study                      | Selection                            |                                    |                           |                                                                                    | Comparability           | Outcomes              |                                                 |                                  |
|----------------------------|--------------------------------------|------------------------------------|---------------------------|------------------------------------------------------------------------------------|-------------------------|-----------------------|-------------------------------------------------|----------------------------------|
|                            | Representativeness of exposed cohort | Selection of the nonexposed cohort | Ascertainment of exposure | Demonstration that outcome of interest was not represent at the start of the study | Comparability of Cohort | Assessment of outcome | Was follow-up long enough for outcomes to occur | Adequacy of follow up of cohorts |
| Weitekamp et al. 1985 [17] | –                                    | –                                  | ★                         | ★                                                                                  | –                       | ★                     | ★                                               | ★                                |
| Cohen et al. 1988 [18]     | –                                    | –                                  | ★                         | ★                                                                                  | –                       | ★                     | ★                                               | –                                |
| Grasela et al. 1989 [19]   | –                                    | –                                  | ★                         | ★                                                                                  | ★                       | ★                     | ★                                               | ★                                |
| Goss et al. 1992 [20]      | –                                    | –                                  | ★                         | ★                                                                                  | ★★                      | ★                     | ★                                               | –                                |
| Baxter et al. 1985 [21]    | ★                                    | –                                  | ★                         | –                                                                                  | –                       | ★                     | ★                                               | ★                                |
| Meyers et al. 1985 [22]    | –                                    | –                                  | ★                         | –                                                                                  | –                       | ★                     | ★                                               | ★                                |
| Bertino et al. 1986 [23]   | ★                                    | ★                                  | ★                         | ★                                                                                  | –                       | ★                     | ★                                               | ★                                |
| Brown et al. 1986 [24]     | ★                                    | ★                                  | ★                         | ★                                                                                  | –                       | ★                     | ★                                               | ★                                |
| Strom et al. 1999 [25]     | ★                                    | ★                                  | ★                         | –                                                                                  | ★                       | ★                     | ★                                               | ★                                |

**Table S5. Newcastle-Ottawa Scale (NOS) for assessing the quality of case-control, case-population and case/noncase studies.**

| Study                 | Selection                       |                             |                       |                        | Comparability                                            | Exposure                  |                                                 |                  |
|-----------------------|---------------------------------|-----------------------------|-----------------------|------------------------|----------------------------------------------------------|---------------------------|-------------------------------------------------|------------------|
|                       | Is the case definition adequate | Representativeness of cases | Selection of controls | Definition of controls | Study controls for important factor or additional factor | Ascertainment of exposure | Same method of ascertainment cases and controls | Nonresponse rate |
| Chen et al. 2006 [26] | ★                               | ★                           | —                     | ★                      | ★★                                                       | ★                         | ★                                               | ★                |

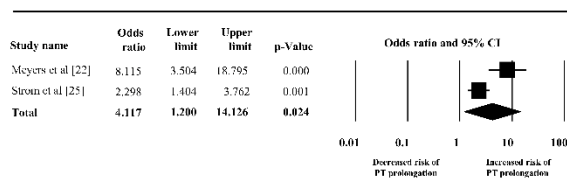

Heterogeneity:  $I^2=45.49\%$ ,  $P$ -value 0.011

**S6A. Cefoperazone**

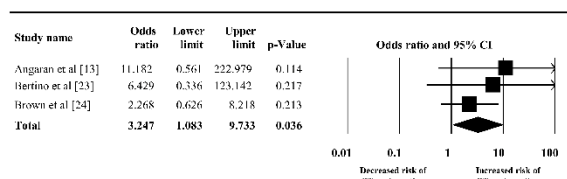

Heterogeneity:  $I^2=0\%$ ,  $P$ -value 0.369

**S6B. Cefamandole**

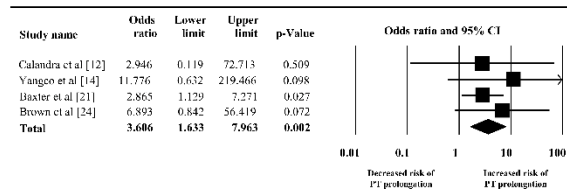

Heterogeneity:  $I^2=0\%$ ,  $P$ -value 0.483

**S6C. Moxalactam**

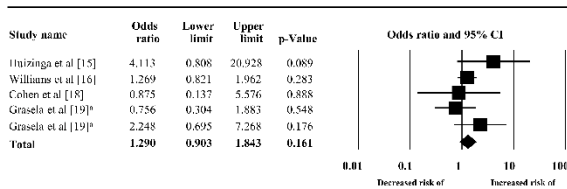

Heterogeneity:  $I^2=75.11\%$ ,  $P$ -value 0.367

**S6D. Cefotetan**

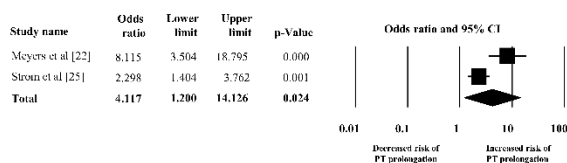

Heterogeneity:  $I^2=45.49\%$ ,  $P$ -value 0.011

**S6A. Cefoperazone**

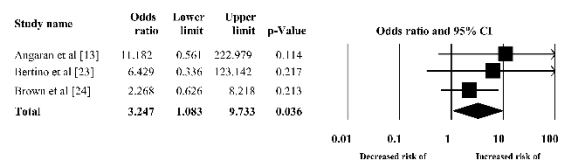

Heterogeneity:  $I^2=0\%$ ,  $P$ -value 0.369

**S6B. Cefamandole**

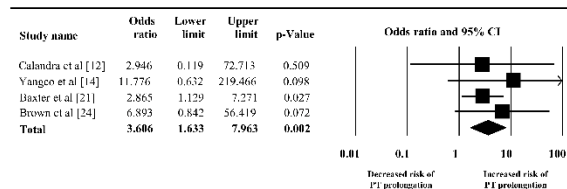

Heterogeneity:  $I^2=0\%$ ,  $P$ -value 0.483

**S6C. Moxalactam**

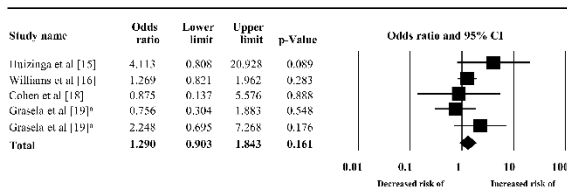

Heterogeneity:  $I^2=75.11\%$ ,  $P$ -value 0.367

**S6D. Cefotetan**

**Figure S6. Subgroup analyses of PT prolongation and NMTT-cephalosporins.**

NMTT, N-methylthiotetrazole side chain.

<sup>a</sup> Multiple control groups from the study werewas treated independently in the meta-analysis.
